# Supplementary material
Source: ML conference proceedings conference paper supplement (https://proceedings.mlr.press/v89/karakida19a.html)
Supplement: Supplementary file [file karakida19a-supp.pdf]

---

# Universal Statistics of Fisher Information in Deep Neural Networks: Mean Field Approach

---

Ryo Karakida  
AIST, Japan

Shotaro Akaho  
AIST, Japan

Shun-ichi Amari  
RIKEN CBS, Japan

## Supplementary Materials

### A Proofs

#### A.1 Theorem 1

##### (i) Case of $C = 1$

To avoid complicating the notation, we first consider the case of the single output ( $C = 1$ ). The general case is shown after. The network output is denoted by  $f(t)$  here. We denote the Fisher information matrix with full components as

$$F = \sum_{t=1}^T \begin{bmatrix} \nabla_W f(t) \nabla_W f(t)^T & \nabla_W f(t) \nabla_b f(t)^T \\ \nabla_b f(t) \nabla_W f(t)^T & \nabla_b f(t) \nabla_b f(t)^T \end{bmatrix} / T, \quad (\text{A.1})$$

where we notice that

$$\nabla_{b^i} f(t) = \delta_i^l(t). \quad (\text{A.2})$$

In general, the sum over the eigenvalues is given by the matrix trace,  $m_\lambda = \text{Trace}(F)/P$ . We also denote the average of the eigenvalues of the diagonal block as  $m_\lambda^{(W)}$  for  $\nabla_W f \nabla_W f^T$ , and  $m_\lambda^{(b)}$  for  $\nabla_b f \nabla_b f^T$ . Accordingly, we find

$$m_\lambda = m_\lambda^{(W)} + m_\lambda^{(b)}. \quad (\text{A.3})$$

The contribution of  $m_\lambda^{(b)}$  is negligible in the large  $M$  limit as follows. The first term is

$$m_\lambda^{(W)} = \sum_{t=1}^T \text{Trace}(\nabla_W f(t) \nabla_W f(t)^T) / (TP) \quad (\text{A.4})$$

$$= \sum_{t=1}^T \sum_l \sum_{i,j} \delta_i^l(t)^2 h_j^{l-1}(t)^2 / (TP). \quad (\text{A.5})$$

We can apply the central limit theorem to summations over the units  $\sum_i \delta_i^l(t)^2$  and  $\sum_j h_j^{l-1}(t)^2$  independently because they do not share the index of the summation. By taking the limit of  $M \gg 1$ , we obtain  $\sum_i \delta_i^l(t)^2 \sum_j h_j^{l-1}(t)^2 / M_{l-1} = \tilde{q}^l \hat{q}^{l-1}$ . The variable  $\tilde{q}^l$  is computed by the recursive relation (9). Under the Assumption 1,  $\hat{q}^{l-1}$  is given by the recursive relation (11). Note that this transformation to the macroscopic variables holds regardless of the sample index  $t$ . Therefore, we obtain

$$m_\lambda^{(W)} = \kappa_1 / M, \quad \kappa_1 := \sum_{l=1}^L \frac{\alpha_{l-1}}{\alpha} \tilde{q}^l \hat{q}^{l-1}, \quad (\text{A.6})$$

where  $\alpha_l$  comes from  $M_l = \alpha_l M$ , and  $\alpha$  comes from  $P = \alpha M^2$ .

In contrast, the contributions of the bias entries are smaller than those of the weight entries in the limit of  $M \gg 1$ , as is easily confirmed:

$$m_\lambda^{(b)} = \sum_t \text{Trace}(\nabla_b f(t) \nabla_b f(t)^T) / (TP) \quad (\text{A.7})$$

$$= \sum_t \sum_l \sum_i \delta_i^l(t)^2 / (TP) \quad (\text{A.8})$$

$$= \sum_l \hat{q}^l / (\alpha M^2) \quad (\text{when } M \gg 1). \quad (\text{A.9})$$

$m_\lambda^{(W)}$  is  $O(1/M)$  while  $m_\lambda^{(b)}$  is  $O(1/M^2)$ . Hence, the mean  $m_\lambda^{(b)}$  is negligible and we obtain  $m_\lambda = \kappa_1/M$ .

(ii)  $C > 1$  of  $O(1)$

We can apply the above computation of  $C = 1$  to each network output  $\nabla f_k$  ( $k = 1, \dots, C$ ):

$$\text{Trace}(\nabla_\theta f_k \nabla_\theta f_k^T / T) / P = \kappa_1 / M. \quad (\text{A.10})$$

Therefore, the mean of the eigenvalues becomes

$$m_\lambda = \sum_k^C \text{Trace}(\nabla_\theta f_k \nabla_\theta f_k^T / T) / P \quad (\text{A.11})$$

$$= C \kappa_1 / M. \quad (\text{A.12})$$

■

## A.2 Corollary 2

Because the FIM is a positive semi-definite matrix, its eigenvalues are non-negative. For a constant  $k > 0$ , we obtain

$$m_\lambda = \frac{1}{P} \left( \sum_{i: \lambda_i < k} \lambda_i + \sum_{i: \lambda_i \geq k} \lambda_i \right) \quad (\text{A.13})$$

$$\geq \frac{1}{P} \sum_{i: \lambda_i \geq k} \lambda_i \quad (\text{A.14})$$

$$\geq \frac{1}{P} N(\lambda \geq k) k. \quad (\text{A.15})$$

This is known as Markov's inequality. When  $M \gg 1$ , combining this with Theorem 1 immediately yields Corollary 2:

$$N(\lambda \geq k) \leq \alpha \kappa_1 C M / k. \quad (\text{A.16})$$

■

## A.3 Theorem 3

Let us describe the outline of the proof. One can express the FIM as  $F = (BB^T)/T$  by definition. Here, let us consider a dual matrix of  $F$ , that is,  $F^* := (B^T B)/T$ .  $F$  and  $F^*$  have the same nonzero eigenvalues. Because the sum of squared eigenvalues is equal to  $\text{Trace}(F^*(F^*)^T)$ , we have  $s_\lambda = \sum_{s,t}^T (F_{st}^*)^2 / P$ . The non-diagonal entry  $F_{st}^*$  ( $s \neq t$ ) corresponds to an inner product of the network activities for different inputs  $x(s)$  and  $x(t)$ , that is,  $\kappa_{st}$ . The diagonal entry  $F_{ss}^*$  is given by  $\kappa_1$ . Taking the summation of  $(F_{st}^*)^2$  over all of  $s$  and  $t$ , we obtain the theorem. In particular, when  $T = 1$  and  $C = 1$ ,  $F^*$  is equal to the squared norm of the derivative  $\nabla_\theta f_\theta$ , that is,  $F^* = \|\nabla_\theta f_\theta\|^2$ , and one can easily check  $s_\lambda = \alpha \kappa_1^2$ .

The detailed proof is given as follows.

**(i) Case of  $C = 1$** 

Here, let us express the FIM as  $F = \nabla_{\theta} f \nabla_{\theta} f^T / T$ , where  $\nabla_{\theta} f$  is a  $P \times T$  matrix whose columns are the gradients on each input sample, i.e.,  $\nabla_{\theta} f(t)$  ( $t = 1, \dots, T$ ). We also introduce a dual matrix of  $F$ , that is,  $F^*$ :

$$F^* := \nabla_{\theta} f^T \nabla_{\theta} f / T. \quad (\text{A.17})$$

Note that  $F$  is a  $P \times P$  matrix while  $F^*$  is a  $T \times T$  matrix. We can easily confirm that these  $F$  and  $F^*$  have the same non-zero eigenvalues.

The squared sum of the eigenvalues is given by  $\sum_i \lambda_i^2 = \text{Trace}(F^*(F^*)^T) = \sum_{st} (F_{st}^*)^2$ . By using the Frobenius norm  $\|A\|_F := \sqrt{\sum_{ij} A_{ij}^2}$ , this is  $\sum_i \lambda_i^2 = \|F^*\|_F^2$ . Similar to  $m_{\lambda}$ , the bias entries in  $F^*$  are negligible because the number of the entries is much less than that of weight entries. Therefore, we only need to consider the weight entries. The  $st$ -th entry of  $F^*$  is given by

$$F_{st}^* = \sum_l \sum_{ij} \nabla_{W_{ij}^l} f(s) \nabla_{W_{ij}^l} f(t) / T \quad (\text{A.18})$$

$$= \sum_l M_{l-1} \tilde{Z}^l(s, t) \hat{Z}^{l-1}(s, t) / T, \quad (\text{A.19})$$

where we defined

$$\hat{Z}^l(s, t) := \frac{1}{M_l} \sum_j h_j^l(s) h_j^l(t), \quad \tilde{Z}^l(s, t) := \sum_i \delta_i^l(s) \delta_i^l(t). \quad (\text{A.20})$$

We can apply the central limit theorem to  $\hat{Z}^{l-1}(s, t)$  and  $\tilde{Z}^l(s, t)$  independently because they do not share the index of the summation. For  $s \neq t$ , we have  $\hat{Z}^l = \hat{q}_{st}^l + \mathcal{N}(0, \hat{\gamma}/M)$  and  $\tilde{Z}^l = \tilde{q}_{st}^l + \mathcal{N}(0, \tilde{\gamma}/M)$  in the limit of  $M \gg 1$ , where the macroscopic variables  $\hat{q}_{st}^l$  and  $\tilde{q}_{st}^l$  satisfy the recurrence relations (10) and (12). Note that the recurrence relation (12) requires the Assumption 1.  $\hat{\gamma}$  and  $\tilde{\gamma}$  are constants of  $O(1)$ . Then, for all  $s$  and  $t (\neq s)$ ,

$$F_{st}^* = \sum_l M_{l-1} (\tilde{q}_{st}^l + O(1/\sqrt{M})) (\hat{q}_{st}^{l-1} + O(1/\sqrt{M})) / T \quad (\text{A.21})$$

$$= \alpha \kappa_2 M / T + O(\sqrt{M}) / T. \quad (\text{A.22})$$

Similarly, for  $s = t$ , we have  $\hat{Z}^l = \hat{q}^l + O(1/\sqrt{M})$ ,  $\tilde{Z}^l = \tilde{q}^l + O(1/\sqrt{M})$  and then  $F_{ss}^* = \alpha \kappa_1 M / T + O(\sqrt{M}) / T$ .

Thus, under the limit of  $M \gg 1$ , the dual matrix is asymptotically given by

$$F^* = \alpha M K / T + O(\sqrt{M}) / T, \quad K := \begin{bmatrix} \kappa_1 & \kappa_2 & \cdots & \kappa_2 \\ \kappa_2 & \kappa_1 & & \vdots \\ \vdots & & \ddots & \kappa_2 \\ \kappa_2 & \cdots & \kappa_2 & \kappa_1 \end{bmatrix}. \quad (\text{A.23})$$

Neglecting the lower order term, we obtain

$$s_{\lambda} = \sum_{s,t}^T (F_{st}^*)^2 / P \quad (\text{A.24})$$

$$= \alpha \left( \frac{T-1}{T} \kappa_2^2 + \frac{1}{T} \kappa_1^2 \right). \quad (\text{A.25})$$

Note that, when  $\hat{q}_{st}^l = 0$ ,  $\kappa_2$  becomes zero and the lower order term may be non-negligible. In this exceptional case, we have  $s_{\lambda} = \alpha \kappa_1^2 / T + O(1/M)$ , where the second term comes from the  $O(\sqrt{M}) / T$  term of Eq. (A.23). Therefore, the lower order evaluation depends on the  $T/M$  ratio, although it is outside the scope of this study. Intuitively, the origin of  $\hat{q}_{st}^l \neq 0$  is related to the offset of firing activities  $h_i^l$ . The condition of  $\hat{q}_{st}^l \neq 0$  is satisfied when the bias terms exist or when the activation  $\phi(\cdot)$  is not an odd function. In such cases, the firing activities have the offset  $E[h_i^l(t)] \neq 0$ . Therefore, for any input samples  $s$  and  $t$  ( $s \neq t$ ), we have  $\sum_i h_i^l(s) h_i^l(t) / M_l = \hat{q}_{st}^l \neq 0$  and then  $\kappa_2 \neq 0$  makes  $s_{\lambda}$  of  $O(1)$ .

(ii)  $C > 1$  of  $O(1)$

Here, we introduce the following dual matrix  $F^*$ :

$$F^* := B^T B / T, \quad (\text{A.26})$$

$$B := [\nabla_{\theta} f_1 \quad \nabla_{\theta} f_2 \quad \cdots \quad \nabla_{\theta} f_C], \quad (\text{A.27})$$

where  $\nabla_{\theta} f_k$  is a  $P \times T$  matrix whose columns are the gradients on each input sample, i.e.,  $\nabla_{\theta} f_k(t)$  ( $t = 1, \dots, T$ ), and  $B$  is a  $P \times CT$  matrix. The FIM is represented by  $F = BB^T / T$ .  $F^*$  is a  $CT \times CT$  matrix and consists of  $T \times T$  block matrices,

$$F^*(k, k') := \nabla_{\theta} f_k^T \nabla_{\theta} f_{k'} / T, \quad (\text{A.28})$$

for  $k, k' = 1, \dots, C$ .

The diagonal block  $F^*(k, k)$  is evaluated in the same way as the case of  $C = 1$ . It becomes  $\alpha MK / T$  as shown in Eq. (A.23). The non-diagonal block  $F^*(k, k')$  has the following  $st$ -th entries:

$$F^*(k, k')_{st} = \sum_{ij} \nabla_{W_{ij}^l} f_k^T(s) \nabla_{W_{ij}^l} f_{k'}(t) / T \quad (\text{A.29})$$

$$= M_{l-1} \left( \sum_i \delta_{k,i}^l(s) \delta_{k',i}^l(t) \right) \hat{Z}^{l-1}(s, t) / T. \quad (\text{A.30})$$

Under the limit of  $M \gg 1$ , while  $\tilde{Z}^l(s, t)$  becomes  $\tilde{q}_{st}^l$  of  $O(1)$ ,  $(\sum_i \delta_{k,i}^l(s) \delta_{k',i}^l(t))$  becomes zero and its lower order term of  $O(1/\sqrt{M})$  appears. This is because the different outputs ( $k \neq k'$ ) do not share the weights  $W_{ij}^l$ . We have  $\sum_i \delta_{k,i}^l(s) \delta_{k',i}^l(t) = 0$  and then obtain  $\sum_i \delta_{k,i}^l(s) \delta_{k',i}^l(t) = 0$  ( $l = 1, \dots, L-1$ ) through the backpropagated chain (7). Thus, the entries of the non-diagonal blocks (A.28) become of  $O(\sqrt{M})/T$ , and we have

$$F^*(k, k') = \alpha MK / T \delta_{k,k'} + O(\sqrt{M}) / T, \quad (\text{A.31})$$

where  $\delta_{k,k'}$  is the Kronecker delta.

After all, we have

$$s_{\lambda} = \sum_{k,k'}^C \sum_{s,t}^T (F^*(k, k')_{st})^2 / P \quad (\text{A.32})$$

$$= C\alpha \left( \frac{T-1}{T} \kappa_2^2 + \frac{1}{T} \kappa_1^2 \right) + CO(1/\sqrt{M}) + C(C-1)O(1/M), \quad (\text{A.33})$$

where the first term comes from the diagonal blocks of  $O(M)$  and the second one is their lower order term. The third term comes from the non-diagonal blocks of  $O(\sqrt{M})$ . As one can see from here, when  $C = O(M)$ , the third term becomes non-negligible. This case is examined in Section 3.4.  $\blacksquare$

## A.4 Theorem 4

(i) Case of  $C = 1$

Because  $F$  and  $F^*$  have the same non-zero eigenvalues, what we should derive here is the maximum eigenvalue of  $F^*$ . As shown in Eq. (A.23), the leading term of  $F^*$  asymptotically becomes  $\alpha MK / T$  in the limit of  $M \gg 1$ . The eigenvalues of  $\alpha MK / T$  are explicitly obtained as follows:  $\lambda_{max} = \alpha \left( \frac{T-1}{T} \kappa_2 + \frac{1}{T} \kappa_1 \right) M$  for an eigenvector  $e = (1, \dots, 1)$ , and  $\lambda_i = \alpha(\kappa_1 - \kappa_2)M / T$  for eigenvectors  $e_1 - e_i$  ( $i = 2, \dots, T$ ) where  $e_i$  denotes a unit vector whose entries are 1 for the  $i$ -th entry and 0 otherwise. Thus, we obtain  $\lambda_{max} = \alpha \left( \frac{T-1}{T} \kappa_2 + \frac{1}{T} \kappa_1 \right) M$ .

(ii)  $C > 1$  of  $O(1)$

Let us denote  $F^*$  shown in Eq. (A.31) by  $F^* := \bar{F}^* + R$ .  $\bar{F}^*$  is the leading term of  $F^*$  and given by a  $CT \times CT$  block diagonal matrix whose diagonal blocks are given by  $\alpha MK / T$ .  $R$  denotes the residual term of  $O(\sqrt{M}) / T$ .

In general, the maximum eigenvalue is denoted by the spectral norm  $\|\cdot\|_2$ , that is,  $\lambda_{max} = \|F^*\|_2$ . Using the triangle inequality, we have

$$\lambda_{max} \leq \|\bar{F}^*\|_2 + \|R\|_2, \quad (\text{A.34})$$

We can obtain  $\|\bar{F}^*\|_2 = \alpha \left( \frac{T-1}{T} \kappa_2 + \frac{1}{T} \kappa_1 \right) M$  because the maximum eigenvalues of the diagonal blocks are the same as the case of  $C = 1$ . Its eigenvector is given by a  $CT$ -dimensional vector  $e = (1, \dots, 1)$ . Regarding  $\|R\|_2$ , this is bounded by  $\|R\|_2 \leq \|R\|_F = \sqrt{C^2 \sum_{st} (O(\sqrt{M})/T)^2} = O(C\sqrt{M})$ . Therefore, when  $C = O(1)$ , we can neglect  $\|R\|_2$  of  $O(\sqrt{M})$  compared to  $\|\bar{F}^*\|_2$  of  $O(M)$ .

On the other hand, we can also derive the lower bound of  $\lambda_{max}$  as follows. In general, we have

$$\lambda_{max} = \max_{\mathbf{v}; \|\mathbf{v}\|^2=1} \mathbf{v}^T F^* \mathbf{v}. \quad (\text{A.35})$$

Then, we find

$$\lambda_{max} \geq \mathbf{v}_1^T F^* \mathbf{v}_1, \quad (\text{A.36})$$

where  $v_1$  is a  $CT$ -dimensional vector whose first  $T$  entries are  $1/\sqrt{T}$  and the others are 0, that is,  $v_1 = (1, \dots, 1, 0, \dots, 0)/\sqrt{T}$ . We can compute this lower bound by taking the sum over the entries of  $F^*(1, 1)$ , which is equal to Eq. (A.23):

$$\lambda_{max} \geq \left( \frac{T-1}{T} \kappa_2 + \frac{1}{T} \kappa_1 \right) M. \quad (\text{A.37})$$

Finally, we find that the upper bound (A.34) and lower bound (A.37) asymptotically take the same value of  $O(M)$ , that is,  $\lambda_{max} = \left( \frac{T-1}{T} \kappa_2 + \frac{1}{T} \kappa_1 \right) M$ . ■

## A.5 Case of $C = O(M)$

The mean of eigenvalues  $m'_\lambda$  is derived in the same way as shown in Section A.1 (ii), that is,  $m'_\lambda = C\kappa_1/M$ .

Regarding the second moment  $s'_\lambda$ , the lower order term becomes non-negligible as remarked in Eq. (A.33). We evaluate this  $s'_\lambda$  by using inequalities as follows:

$$s'_\lambda = \|F^*\|_F^2 / P \quad (\text{A.38})$$

$$= \left( \sum_k^C \|\nabla_\theta f_k^T \nabla_\theta f_k\|_F^2 + \sum_{k,k'}^C \|\nabla_\theta f_k^T \nabla_\theta f_{k'}\|_F^2 \right) / P \quad (\text{A.39})$$

$$\geq \sum_k^C \|\nabla_\theta f_k^T \nabla_\theta f_k\|_F^2 / P. \quad (\text{A.40})$$

As shown in Section A.3, for any  $k$ , we obtain  $\|\nabla_\theta f_k^T(s) \nabla_\theta f_k(t)\|_F^2 / P = \alpha \left( \frac{T-1}{T} \kappa_2^2 + \frac{1}{T} \kappa_1^2 \right)$  in the limit of  $M \gg 1$ . Thus, the lower bound becomes the same form as  $s_\lambda$ , That is,  $s_\lambda = C\alpha \left( \frac{T-1}{T} \kappa_2^2 + \frac{1}{T} \kappa_1^2 \right)$ . In contrast, the upper bound is given by

$$s'_\lambda = \|F\|_F^2 / P \quad (\text{A.41})$$

$$= \left\| \sum_k^C F_k \right\|_F^2 / P \quad (\text{A.42})$$

$$\leq \left( \sum_k^C \|F_k\|_F \right)^2 / P, \quad (\text{A.43})$$

where  $F_k$  denotes the FIM of the  $k$ -th output, i.e.,  $F_k := \sum_t \nabla_\theta f_k(t) \nabla_\theta f_k(t)^T / T$ . Therefore, the upper bound is reduced to the summation over  $s_\lambda$  of  $C = 1$ . In the limit of  $M \gg 1$ , we obtain  $s'_\lambda \leq C^2 \|F_k\|_F^2 / P = C^2 \alpha \left( \frac{T-1}{T} \kappa_2^2 + \frac{1}{T} \kappa_1^2 \right) = C s_\lambda$ .

Next, we show inequalities for  $\lambda_{max}$ . We have already derived the lower bound (A.37) and this bound holds in the case of  $C = O(M)$  as well. In contrast, the upper bound (A.34) may become loose when  $C$  is larger than  $O(1)$  because of the residual term  $\|R\|_2$ . Although it is hard to explicitly obtain the value of  $\|R\|_2$ , the following upper bound holds and is easy to compute by using  $s_\lambda$  of Eq. (14). Because the FIM is a positive semi-definite matrix,  $\lambda_i \geq 0$  holds by definition. Then, we have  $\lambda_{max} \leq \sqrt{\sum_i \lambda_i^2}$ . Combining this with  $s'_\lambda = \sum_i \lambda_i^2/P$ , we have  $\lambda_{max} \leq \sqrt{\alpha s'_\lambda} M \leq \sqrt{\alpha C s_\lambda} M$ . ■

## A.6 Theorem 5

The Fisher-Rao norm is written as

$$\|\theta\|_{FR} = \sum_{l,ij} \sum_{l',ab} F_{(l,ij),(l',ab)} W_{ij}^l W_{ab}^{l'}, \quad (\text{A.44})$$

where  $F_{(l,ij),(l',ab)}$  represents an entry of the FIM, that is,  $\sum_k^C \sum_t \nabla_{W_{ij}^l} f_k(t) \nabla_{W_{ab}^{l'}} f_k(t)/T$ . Because  $F_{(l,ij),(l',ab)}$  includes the random variables  $W_{ij}^l$  and  $W_{ab}^{l'}$ , we consider the following expansion. Note that  $W_{ij}^l$  and  $W_{ab}^{l'}$  are infinitesimals generated by Eq. (8). Performing a Taylor expansion around  $W_{ij}^l = W_{ab}^{l'} = 0$ , we obtain

$$\begin{aligned} F_{(l,ij),(l',ab)}(\theta) &= F_{(l,ij),(l',ab)}(\theta^*) + \frac{\partial F_{(l,ij),(l',ab)}}{\partial W_{ij}^l}(\theta^*) W_{ij}^l + \frac{\partial F_{(l,ij),(l',ab)}}{\partial W_{ab}^{l'}}(\theta^*) W_{ab}^{l'} \\ &\quad + \text{higher-order terms}, \end{aligned} \quad (\text{A.45})$$

where  $\theta^*$  is the parameter set  $\{W_{ij}^l, b_i^l\}$  with  $W_{ij}^l = W_{ab}^{l'} = 0$ . By substituting the above expansion into the Fisher-Rao norm and taking the average  $\langle \cdot \rangle_\theta$ , we obtain the following leading term:

$$\langle F_{(l,ij),(l',ab)} W_{ij}^l W_{ab}^{l'} \rangle_\theta = \langle F_{(l,ij),(l',ab)}(\theta^*) W_{ij}^l W_{ab}^{l'} \rangle_\theta \quad (\text{A.46})$$

$$= \langle F_{(l,ij),(l',ab)}(\theta^*) \rangle_{\theta^*} \langle W_{ij}^l W_{ab}^{l'} \rangle_{\{W_{ij}^l, W_{ab}^{l'}\}} \quad (\text{A.47})$$

For,  $(l,ij) \neq (l',ab)$ , the last line becomes zero because of  $\langle W_{ij}^l W_{ab}^{l'} \rangle_{\{W_{ij}^l, W_{ab}^{l'}\}} = \langle W_{ij}^l \rangle_{W_{ij}^l} \langle W_{ab}^{l'} \rangle_{W_{ab}^{l'}} = 0$ . For  $(l,ij) = (l',ab)$ , we have  $\langle (W_{ij}^l)^2 \rangle_{\{W_{ij}^l\}} = \sigma_w^2/M_{l-1}$ . After all, in the limit of  $M \gg 1$ , we obtain

$$\langle \|\theta\|_{FR} \rangle_\theta = \sum_k^C \frac{\sum_t}{T} \sum_l \langle \sum_i \delta_{k,i}^l(t)^2 \sum_j h_j^{l-1}(t)^2 \rangle_{\theta^*} \frac{\sigma_w^2}{M_{l-1}} \quad (\text{A.48})$$

$$= \sum_k^C \frac{\sum_t}{T} \sigma_w^2 \sum_l \langle \tilde{q}^l \rangle_\theta \langle \hat{q}^{l-1} \rangle_\theta \quad (\text{A.49})$$

$$= \sigma_w^2 C \sum_l \tilde{q}^l \hat{q}^{l-1}, \quad (\text{A.50})$$

where the derivation of the macroscopic variables is similar to that of  $m_\lambda$ , as shown in Section A.1. Since we have  $\kappa_1 = \sum_l \frac{\alpha_{l-1}}{\alpha} \tilde{q}^l \hat{q}^{l-1}$ , it is easy to confirm  $\langle \|\theta\|_{FR} \rangle_\theta \leq C \sigma_w^2 \alpha / \alpha_{min} C \kappa_1$ . When all  $\alpha_l$  take the same value, we have  $\alpha / \alpha_{min} = L - 1$  and the equality holds. ■

## A.7 Lemma 6

Suppose a perturbation around the global minimum:  $\theta_t = \theta^* + \Delta_t$ . Then, the gradient update becomes

$$\Delta_{t+1} \leftarrow (I - \eta F) \Delta_t + \mu (\Delta_t - \Delta_{t-1}), \quad (\text{A.51})$$

where we have used  $E(\theta^*) = 0$  and  $\partial E(\theta^*)/\partial \theta = 0$ .

Consider a coordinate transformation from  $\Delta_t$  to  $\bar{\Delta}_t$  that diagonalizes  $F$ . It does not change the stability of the gradients. Accordingly, we can update the  $i$ -th component as follows:

$$\bar{\Delta}_{t+1,i} \leftarrow (1 - \eta\lambda_i + \mu)\bar{\Delta}_{t,i} - \mu\Delta_{t-1,i}. \quad (\text{A.52})$$

Solving its characteristic equation, we obtain the general solution,

$$\bar{\Delta}_{t,i} = A\lambda_+^t + B\lambda_-^t, \quad \lambda_{\pm} = (1 - \eta\lambda_i + \mu \pm \sqrt{(1 - \eta\lambda_i + \mu)^2 - 4\mu})/2, \quad (\text{A.53})$$

where  $A$  and  $B$  are constants. This recurrence relation converges if and only if  $\eta\lambda_i < 2(1 + \mu)$  for all  $i$ . Therefore,  $\eta < 2(1 + \mu)/\lambda_{max}$  is necessary for the steepest gradient to converge to  $\theta^*$ . ■

## B Analytical recurrence relations

### B.1 Erf networks

Consider the following error function as an activation function  $\phi(x)$ :

$$\text{erf}(x) = \frac{2}{\sqrt{\pi}} \int_0^x \exp(-t^2) dt. \quad (\text{B.1})$$

The error function well approximates the tanh function and has a sigmoid-like shape. For a network with  $\phi(x) = \text{erf}(x)$ , the recurrence relations for macroscopic variables do not require numerical integrations.

(i)  $\hat{q}^l$  and  $\hat{q}^l$ : Note that we can analytically integrate the error functions over a Gaussian distribution:

$$\int_0^\infty Dx \text{erf}(ax) \text{erf}(bx) = \frac{1}{\pi} \tan^{-1} \frac{\sqrt{2}ab}{\sqrt{a^2 + b^2 + 1/2}}. \quad (\text{B.2})$$

Hence, the recurrence relations for the feedforward signals (9) have the following analytical forms:

$$\hat{q}^{l+1} = \frac{2}{\pi} \tan^{-1} \left( \frac{q^{l+1}}{\sqrt{q^{l+1} + 1/4}} \right), \quad q^{l+1} = \sigma_w^2 \hat{q}^l + \sigma_b^2. \quad (\text{B.3})$$

Because the derivative of the error function is Gaussian, we can also easily integrate  $\phi'(x)$  over the Gaussian distribution and obtain the following analytical representations of the recurrence relations (11):

$$\tilde{q}^l = \frac{2\tilde{q}^{l+1}\sigma_w^2}{\pi\sqrt{q^l + 1/4}}, \quad \tilde{q}^L = 1. \quad (\text{B.4})$$

(ii)  $\hat{q}_{st}^l$  and  $\hat{q}_{st}^l$ :

To compute the recurrence relations for the feedforward correlations (10), note that we can generally transform  $I_\phi[a, b]$  into

$$I_\phi[a, b] = \int Dy \left( \int Dx \phi(\sqrt{a-bx} + \sqrt{by}) \right)^2. \quad (\text{B.5})$$

For the error function,

$$\int Dx \phi(\sqrt{a-bx} + \sqrt{by}) = \text{erf} \frac{\sqrt{by}}{\sqrt{1+2a-2b}}, \quad (\text{B.6})$$

and we obtain

$$I_\phi[a, b] = \frac{2}{\pi} \tan^{-1} \frac{2b}{\sqrt{(1+2a)^2 - (2b)^2}}. \quad (\text{B.7})$$

This is the analytical form of the recurrence relation for  $\hat{q}_{st}^l$ .

Finally, because the derivative of the error function is Gaussian, we can also easily obtain

$$I_{\phi'}[a, b] = \frac{4}{\pi\sqrt{(1+2a)^2 - (2b)^2}}. \quad (\text{B.8})$$

This is the analytical forms of the recurrence relations for  $\tilde{q}_{st}^l$ .

## B.2 ReLU networks

We define a ReLU activation as  $\phi(x) = 0$  ( $x < 0$ ),  $x$  ( $0 \leq x$ ). For a network with this ReLU activation function, the recurrence relations for the macroscopic variables require no numerical integrations.

(i)  $\hat{q}^l$  and  $\tilde{q}^l$ : We can explicitly perform the integrations in the recurrence relations (9) and (11):

$$\hat{q}^{l+1} = \hat{q}^l \sigma_w^2 / 2 + \sigma_b^2 / 2, \quad (\text{B.9})$$

$$\tilde{q}^l = \tilde{q}^{l+1} \sigma_w^2 / 2, \quad \tilde{q}^L = 1/2. \quad (\text{B.10})$$

(ii)  $\hat{q}_{st}^l$  and  $\tilde{q}_{st}^l$ : We can explicitly perform the integrations in the recurrence relations (10) and (12):

$$I_\phi[a, b] = \frac{a}{2\pi} (\sqrt{1 - c^2} + c\pi/2 + c \sin^{-1} c), \quad (\text{B.11})$$

$$I_{\phi'}[a, b] = \frac{a}{2\pi} (\pi/2 + \sin^{-1} c), \quad (\text{B.12})$$

where  $c = b/a$ .

## B.3 Linear networks

We define a linear activation as  $\phi(x) = x$ . For a network with this linear activation function, the recurrence relations for the macroscopic variables do not require numerical integrations.

(i)  $\hat{q}^l$  and  $\tilde{q}^l$ : We can explicitly perform the integrations in the recurrence relations (9) and (11):

$$\hat{q}^l = \hat{q}^{l-1} \sigma_w^2 + \sigma_b^2, \quad (\text{B.13})$$

$$\tilde{q}^l = \tilde{q}^{l+1} \sigma_w^2, \quad \tilde{q}^L = 1. \quad (\text{B.14})$$

(ii)  $\hat{q}_{st}^l$  and  $\tilde{q}_{st}^l$ : We can explicitly perform the integrations in the recurrence relations (10) and (12):

$$\hat{q}_{st}^{l+1} = \hat{q}_{st}^l \sigma_w^2 + \sigma_b^2, \quad (\text{B.15})$$

$$\tilde{q}_{st}^l = \tilde{q}_{st}^{l+1} \sigma_w^2, \quad \tilde{q}_{st}^L = 1. \quad (\text{B.16})$$



## C Additional Experiments

### C.1 Dependence on $T$

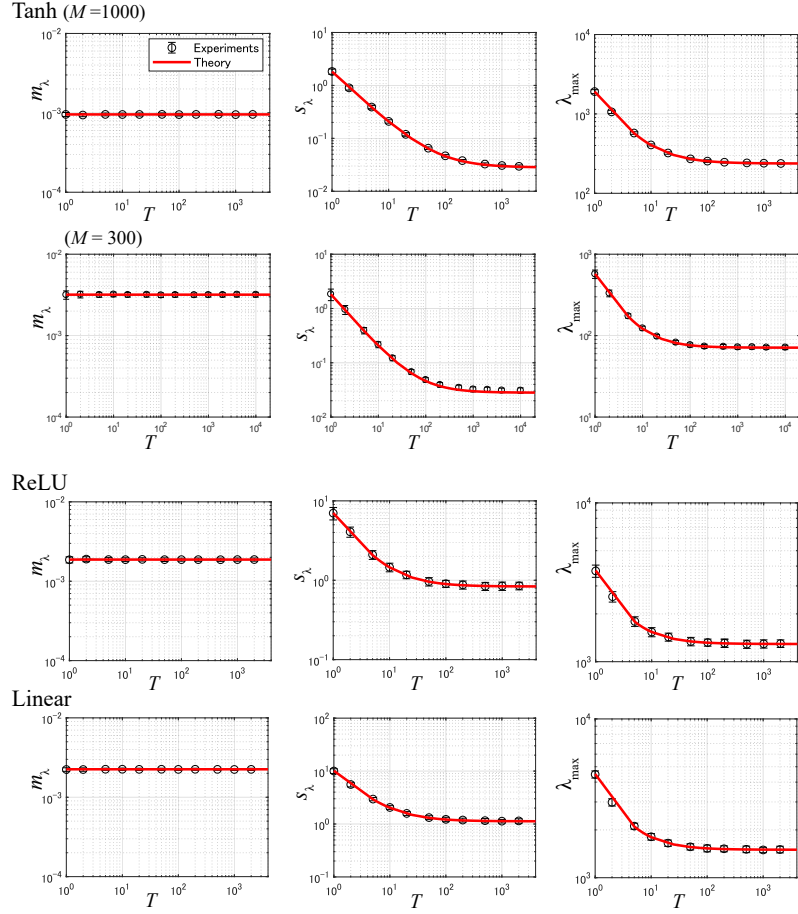

Figure C.1: Statistics of FIM eigenvalues with fixed  $M$  and changing  $T$  ( $L = 3, \alpha_l = C = 1$ ). The red line represents theoretical results obtained in the limit of  $M \gg 1$ . The first row shows results of Tanh networks with  $M = 1000$ . The second row shows those with a relatively small width ( $M = 300$ ) and higher  $T$ . We set  $M = 1000$  in ReLU and linear networks. The other settings are the same as in Fig. 1.

### C.2 Training on CIFAR-10

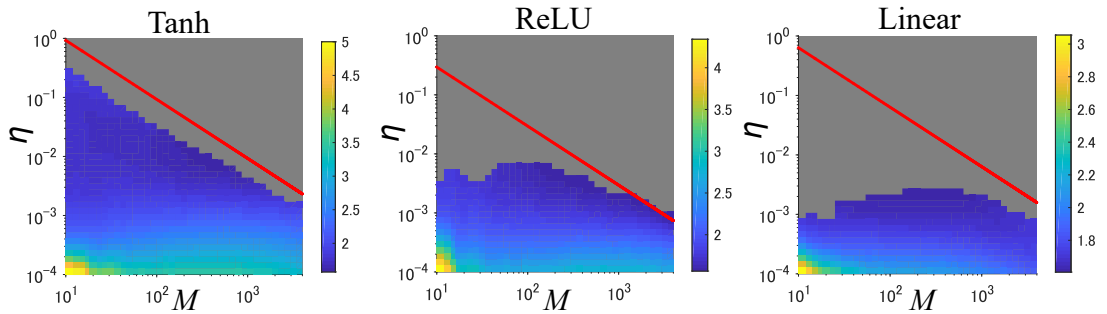

Figure C.2: Color map of training losses after one epoch of SGD training: Tanh, ReLU, and linear networks trained on CIFAR-10.
